# Supplementary material for: Accessible LAMP-Enabled Rapid Test (ALERT) for Detecting SARS-CoV-2
Source: MDPI journal article supplement (doi:10.3390/v13050742), 2021-04-23
Supplement: s1 [file s1]

| Sample #                             | Known Value | Sample Type      | Sample Source    | Ct Value | Result             | Result Interpretation      | Notes          |
|--------------------------------------|-------------|------------------|------------------|----------|--------------------|----------------------------|----------------|
| Validation Trial Conducted In France |             |                  |                  |          |                    |                            |                |
| 1                                    | Negative    | Cross Reactivity | Coronavirus NL63 | 0        | No Fluorescence    | Negative                   |                |
| 2                                    | Positive    | Clinical         | NP               | 27.8     | Fluorescence       | Positive                   |                |
| 3                                    | Positive    | Clinical         | NP               | 22.6     | Fluorescence       | Positive                   |                |
| 4                                    | Positive    | Clinical         | NP               | 37.9     | Fluorescence       | Positive                   |                |
| 5                                    | Positive    | Clinical         | NP               | 20.6     | Fluorescence       | Positive                   |                |
| 6                                    | Positive    | Clinical         | NP               | 31       | No Fluorescence    | Negative                   | False Negative |
| 7                                    | Positive    | Clinical         | NP               | 28       | Fluorescence       | Positive                   |                |
| 8                                    | Positive    | Clinical         | NP               | 23.6     | Fluorescence       | Positive                   |                |
| 9                                    | Positive    | Clinical         | NP               | 18       | Fluorescence       | Positive                   |                |
| 10                                   | Positive    | Clinical         | NP               | 34.3     | Fluorescence       | Positive                   |                |
| 11                                   | Positive    | Clinical         | NP               | 23.6     | Fluorescence       | Positive                   |                |
| 12                                   | Positive    | Clinical         | NP               | 19.6     | Fluorescence       | Positive                   |                |
| 13                                   | Positive    | Clinical         | NP               | 19.1     | Fluorescence       | Positive                   |                |
| 14                                   | Positive    | Clinical         | NP               | 36.1     | No Fluorescence    | Negative                   | False Negative |
| 15                                   | Positive    | Clinical         | NP               | 21.8     | Fluorescence       | Positive                   |                |
| 16                                   | Positive    | Clinical         | NP               | 27       | No Fluorescence    | Negative                   | False Negative |
| 17                                   | Positive    | Clinical         | NP               | 24.5     | Fluorescence       | Positive                   |                |
| 18                                   | Positive    | Clinical         | NP               | 35       | Fluorescence       | Positive                   |                |
| 19                                   | Positive    | Clinical         | NP               | 13       | Fluorescence       | Positive                   |                |
| Validation Trial Conducted In Chile  |             |                  |                  |          |                    |                            |                |
| 1                                    | Negative    | Clinical         | NP               | 0        | Faint Fluorescence | Possible positive - Retest |                |
| 2                                    | Negative    | Clinical         | NP               | 0        | No Fluorescence    | Negative                   |                |
| 3                                    | Negative    | Clinical         | NP               | 0        | No Fluorescence    | Negative                   |                |
| 4                                    | Negative    | Clinical         | NP               | 0        | No Fluorescence    | Negative                   |                |
| 5                                    | Negative    | Clinical         | NP               | 0        | No Fluorescence    | Negative                   |                |
| 6                                    | Negative    | Clinical         | NP               | 0        | No Fluorescence    | Negative                   |                |
| 7                                    | Negative    | Clinical         | NP               | 0        | Faint Fluorescence | Possible positive - Retest |                |
| 8                                    | Negative    | Clinical         | NP               | 0        | Faint Fluorescence | Possible positive - Retest |                |
| 9                                    | Negative    | Clinical         | NP               | 0        | Faint Fluorescence | Possible positive - Retest |                |
| 10                                   | Negative    | Clinical         | NP               | 0        | No Fluorescence    | Negative                   |                |
| 11                                   | Positive    | Clinical         | NP               | 31.68    | Fluorescence       | Positive                   |                |
| 12                                   | Positive    | Clinical         | NP               | 34.57    | Fluorescence       | Positive                   |                |
| 13                                   | Positive    | Clinical         | NP               | 35.34    | Faint Fluorescence | Possible positive - Retest |                |
| 14                                   | Positive    | Clinical         | NP               | 33.4     | Faint Fluorescence | Possible positive - Retest |                |
| 15                                   | Positive    | Clinical         | NP               | 34.32    | Fluorescence       | Positive                   |                |
| 16                                   | Positive    | Clinical         | NP               | 32.2     | Fluorescence       | Positive                   |                |
| 17                                   | Positive    | Clinical         | NP               | 32.34    | Fluorescence       | Positive                   |                |
| 18                                   | Positive    | Clinical         | NP               | 34.17    | Faint Fluorescence | Possible positive - Retest |                |
| 19                                   | Positive    | Clinical         | NP               | 32.55    | Fluorescence       | Positive                   |                |
| 20                                   | Positive    | Clinical         | NP               | 20.25    | Fluorescence       | Positive                   |                |
| 21                                   | Positive    | Clinical         | NP               | 21.22    | Fluorescence       | Positive                   |                |
| 22                                   | Positive    | Clinical         | NP               | 26.88    | Faint Fluorescence | Possible positive - Retest |                |
| 23                                   | Positive    | Clinical         | NP               | 26.11    | Fluorescence       | Positive                   |                |
| 24                                   | Positive    | Clinical         | NP               | 24.16    | Fluorescence       | Positive                   |                |
| 25                                   | Positive    | Clinical         | NP               | 27.68    | Fluorescence       | Positive                   |                |
| 26                                   | Positive    | Clinical         | NP               | 29.29    | Faint Fluorescence | Possible positive - Retest |                |
| 27                                   | Positive    | Clinical         | NP               | 23.63    | Fluorescence       | Positive                   |                |
| 28                                   | Positive    | Clinical         | NP               | 20.85    | Fluorescence       | Positive                   |                |
| 29                                   | Positive    | Clinical         | NP               | 28.1     | Fluorescence       | Positive                   |                |

Data from clinical validation conducted in France and Chile
