# Supplementary material for: Accessible LAMP-Enabled Rapid Test (ALERT) for Detecting SARS-CoV-2
Source: MDPI journal article supplement (doi:10.3390/v13050742), 2021-04-23
Supplement: s1 [file s1]

|  | Approximate LOD (copies/ $\mu$ l) for 95% TPR |
|--|-----------------------------------------------|
|--|-----------------------------------------------|

|             |         |
|-------------|---------|
| RNA (Water) | 25 - 50 |
|-------------|---------|

|             |       |
|-------------|-------|
| Virus (Any) | 1 - 2 |
|-------------|-------|

|                |       |
|----------------|-------|
| Virus (1x PBS) | 1 - 2 |
|----------------|-------|

|               |         |
|---------------|---------|
| Virus (Nasal) | 0.5 - 1 |
|---------------|---------|

|                |           |
|----------------|-----------|
| Virus (Saliva) | 0.1 - 0.5 |
|----------------|-----------|
