# Supplementary material for: Accessible LAMP-Enabled Rapid Test (ALERT) for Detecting SARS-CoV-2
Source: MDPI journal article supplement (doi:10.3390/v13050742), 2021-04-23
Supplement: s1 [file s1]

|                                      | Positive Result | n  | True Negative Rate |
|--------------------------------------|-----------------|----|--------------------|
| Mock Test Samples                    | 0               | 6  | 100.0%             |
| Cross-Reactivity Test Samples        | 1               | 30 | 96.7%              |
| Mock + Cross-Reactivity Test Samples | 1               | 36 | 97.2%              |
