# Supplementary figures and images for: Accessible LAMP-Enabled Rapid Test (ALERT) for Detecting SARS-CoV-2
Source: MDPI journal article supplement (doi:10.3390/v13050742), 2021-04-23

a.

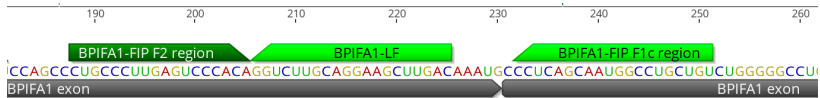

b.

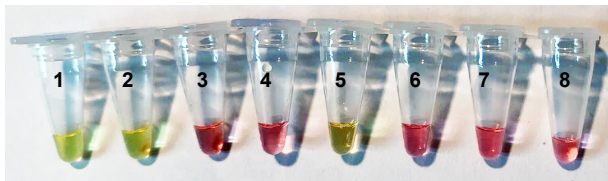

c.

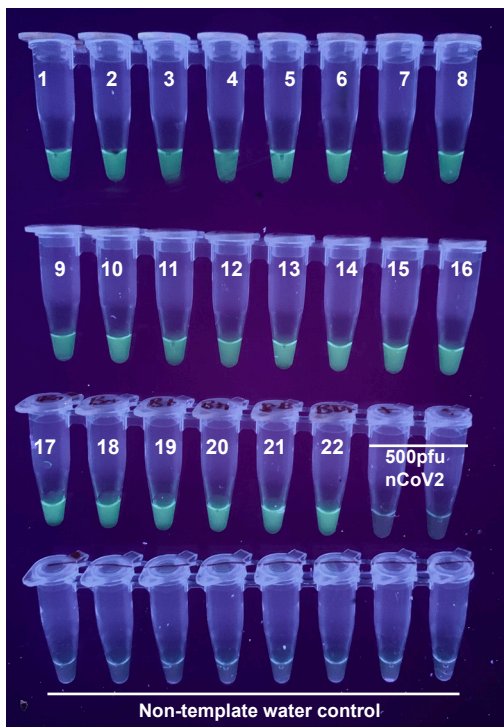

Supplement: s1 [file s1]

a.

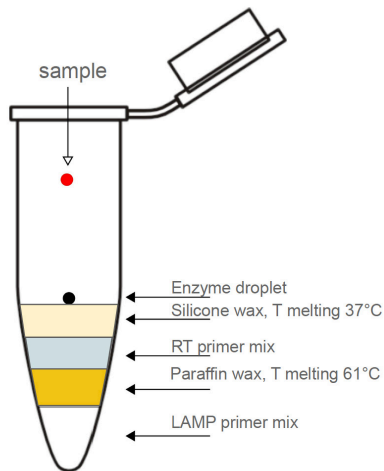

Room temperature

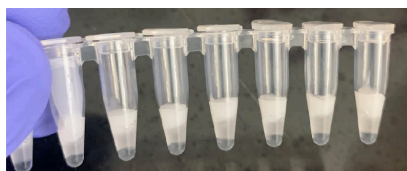

b.

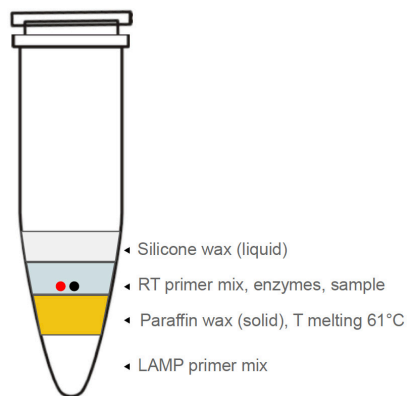

55°C

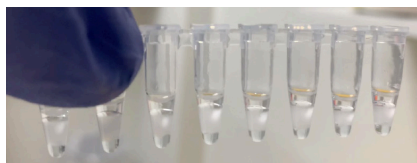

c.

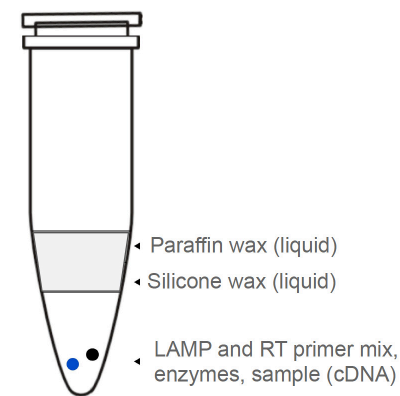

63°C

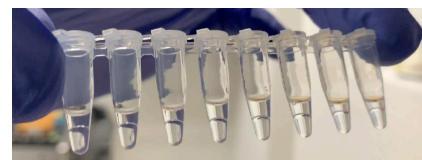

d.

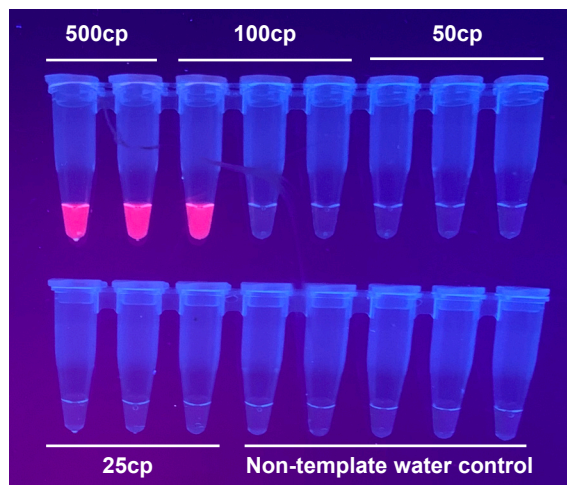

e.

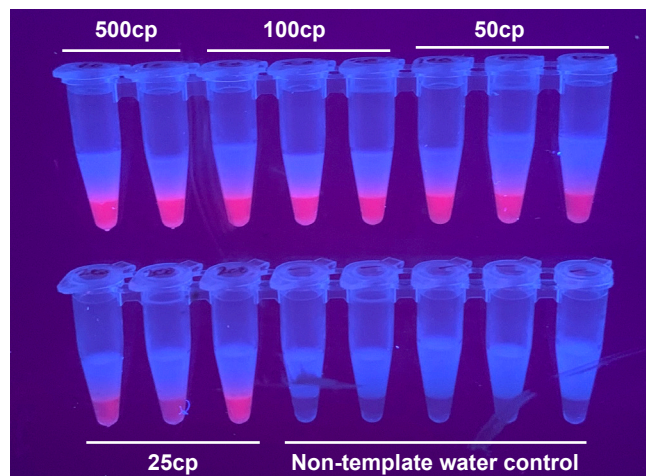

Supplement: s1 [file s1]

a.

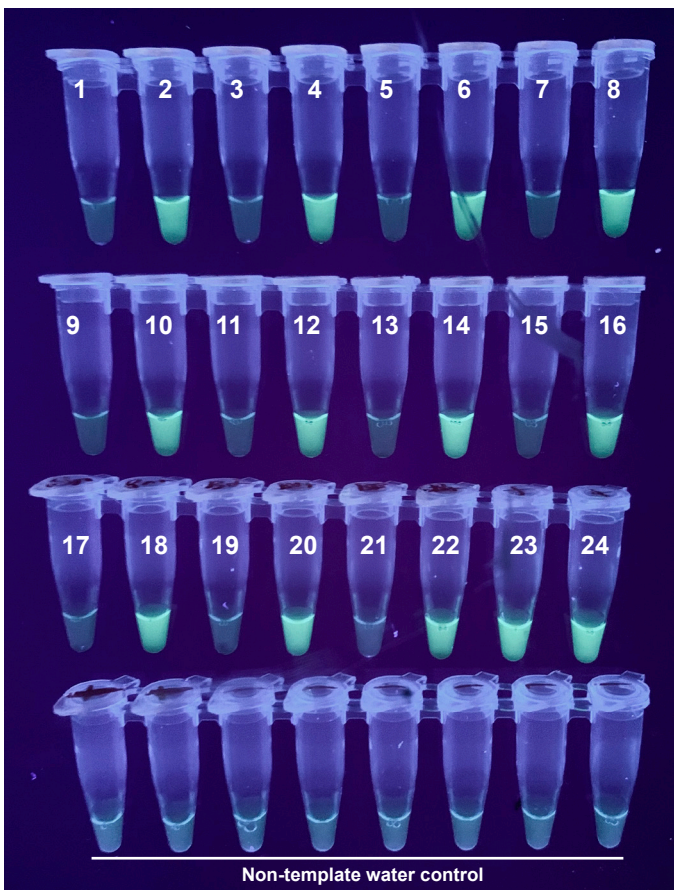

b.

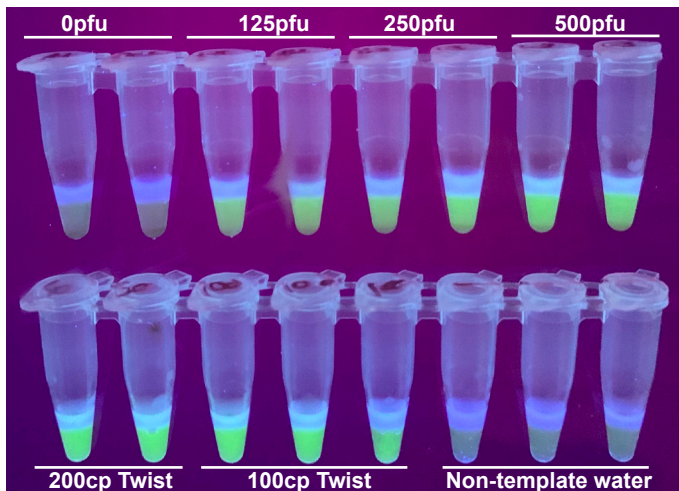

Supplement: s1 [file s1]

a.

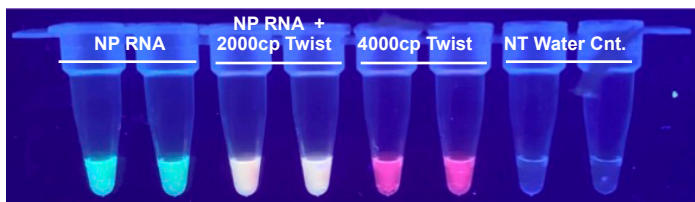

b.

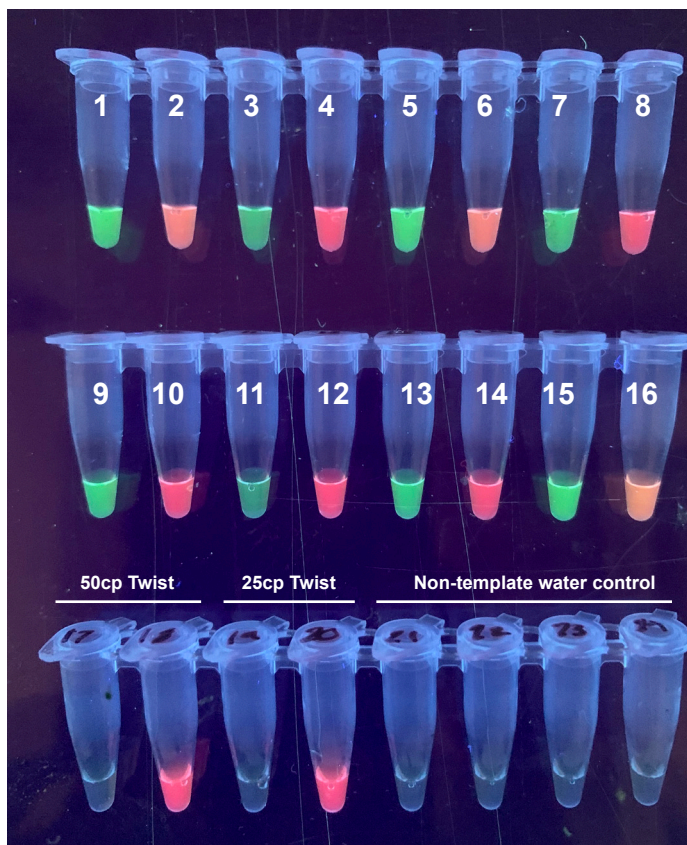

c.

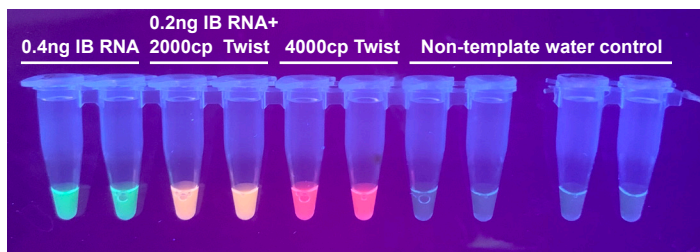

Supplement: s1 [file s1]

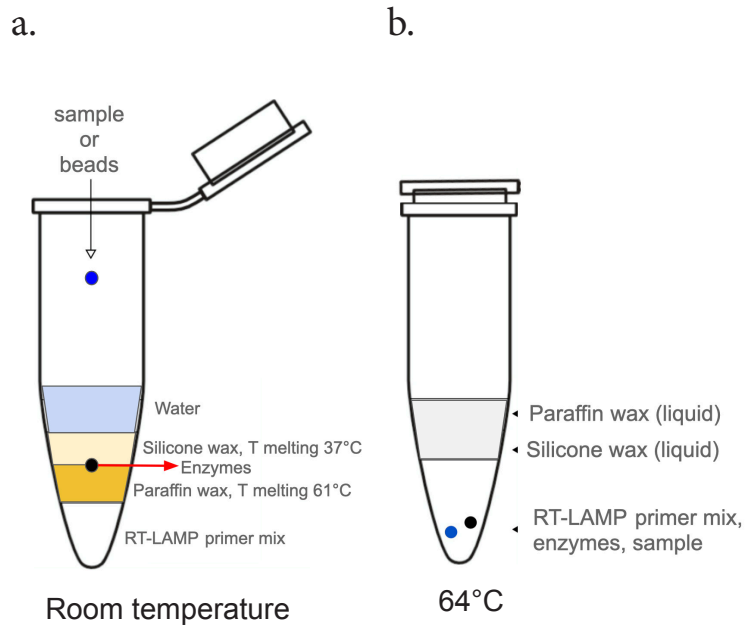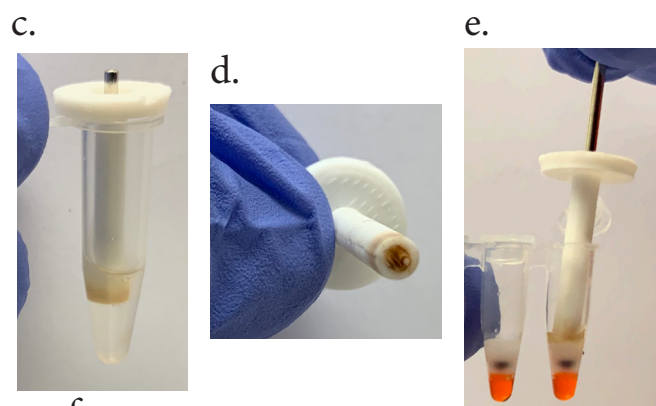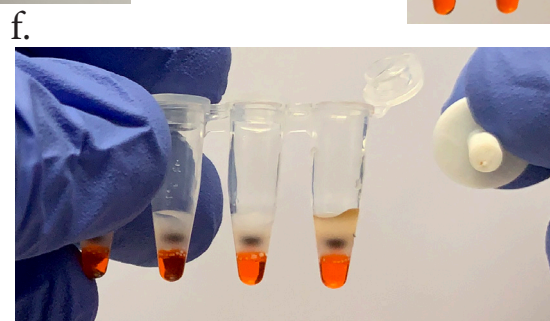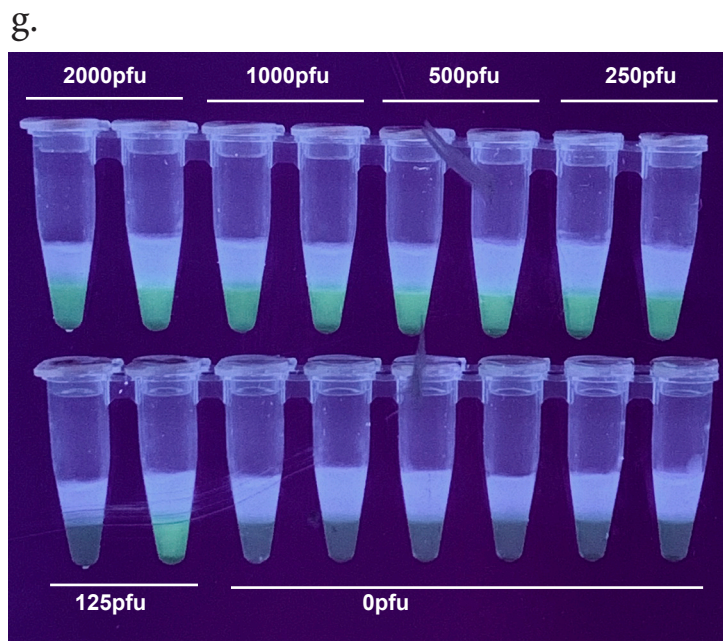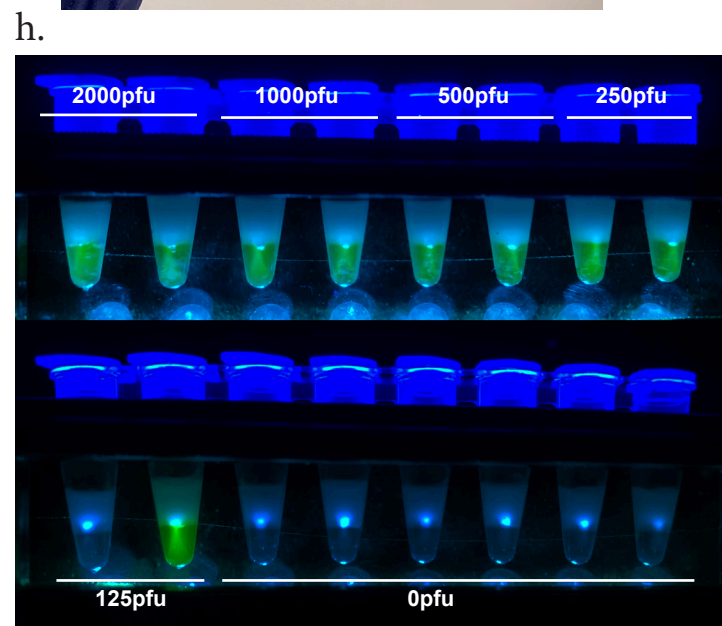

Supplement: s1 [file s1]
